# Supplementary material
Source: HighWire-hosted journal article supplement (https://cmajopen-stage.highwire.org/highwire/filestream/90106/field_highwire_adjunct_files/1/open-2021-0318-2-at.pdf)
Supplement: open-2021-0318-2-at.pdf [file open-2021-0318-2-at.pdf]

## Appendix 2. Administrative databases and codes used

| Variable                           | Administrative codes used                                                                                                                                                                                          | Dataset Used                                    |
|------------------------------------|--------------------------------------------------------------------------------------------------------------------------------------------------------------------------------------------------------------------|-------------------------------------------------|
| CVD composite (1)                  |                                                                                                                                                                                                                    |                                                 |
| Myocardial infarction              | ICD-9: 410.X<br>ICD-10: I21.X, I22.X                                                                                                                                                                               | DAD                                             |
| Angina                             | ICD-9: 411.X, 413.X<br>ICD-10: I20.X, I24.X                                                                                                                                                                        |                                                 |
| Transient ischemic attack          | ICD-9: 435.X<br>ICD-10: G45, G45.0, G45.1, G45.2, G45.3, G45.8, G45.9 (NOT G45.4)                                                                                                                                  |                                                 |
| Acute ischemic stroke              | ICD-9: 433.X, 434.X, 436.X, 362.3X (NOT 433.X0, 434.X0)<br>ICD-10: I63.X, I64.X, H34.1                                                                                                                             |                                                 |
| Heart failure                      | ICD-9: 428.X<br>ICD-10: I50.X                                                                                                                                                                                      | Physician Claims<br>DAD                         |
| Ischemic Heart Disease             | ICD-9: 410.X, 411.X, 412.X, 413.X, 414.X<br>ICD-10: I25.X                                                                                                                                                          |                                                 |
| Percutaneous coronary intervention | CCP: 51.59A, 51.59C, 51.59D, 51.59E, 51.59F                                                                                                                                                                        | Physician Claims                                |
| Coronary artery bypass graft       | CCP: 48.12, 48.12A, 48.13, 48.13A, 48.14, 48.14A, 48.15A, 48.15B, 48.15C, 48.15D, 48.15E, 48.15F, 48.15G                                                                                                           |                                                 |
| Statin Use                         |                                                                                                                                                                                                                    |                                                 |
| Statin use                         | ATC: C10AA                                                                                                                                                                                                         | ABC<br>PIN                                      |
| Elixhauser Comorbidities (2)       |                                                                                                                                                                                                                    |                                                 |
| Congestive Heart Failure           | ICD-9: 398, 402, 404, 425, 428, 398.9, 402.0, 402.1, 402.9, 404.0, 404.1, 404.9, 425.4, 425.5, 425.6, 425.8, 425.9<br><br>ICD-10: I43, I50, I099, I110, I130, I132, I255, I420, I425, I426, I427, I428, I429, P290 | Physician Claims<br>DAD<br>Emergency Department |
| Cardiac Arrhythmias                | ICD-9: 426, 427, 785, 996, 426.0, 426.1, 426.7, 426.9, 427.0, 427.1, 427.2, 427.3, 427.4, 427.6, 427.7, 427.8,                                                                                                     | Physician Claims<br>DAD<br>Emergency Department |

|                                 |                                                                                                                                                                                                                                             |                                                 |
|---------------------------------|---------------------------------------------------------------------------------------------------------------------------------------------------------------------------------------------------------------------------------------------|-------------------------------------------------|
|                                 | 427.9, 785.0, 996.0, V45.0, V53.3<br><br>ICD-10: I47, I48, I49, I441, I442, I443, I456, I459, R000, R001, R008, T821, Z450, Z950                                                                                                            |                                                 |
| Valvular Disease                | ICD-9: 093, 746, 394, 395, 396, 397, 424, 093.2, V42.2, V43.3<br><br>ICD-10: I05, I06, I07, I08, I34, I35, I36, I37, I38, I39, A520, I091, I098, Q230, Q231, Q232, Q233, Z952, Z953, Z954                                                   | Physician Claims<br>DAD<br>Emergency Department |
| Pulmonary Circulation Disorders | ICD-9: 415, 417, 416, 415.0, 415.1, 417.0, 417.8, 417.9<br><br>ICD-10: I26, I27, I280, I288, I289                                                                                                                                           | Physician Claims<br>DAD<br>Emergency Department |
| Peripheral Vascular Disorders   | ICD-9: 093, 437, 443, 447, 557, 440, 441, 093.0, 437.3, 443.1, 443.2, 443.3, 443.4, 443.5, 443.6, 443.7, 443.8, 443.9, 447.1, 557.1, 557.9, V43.4<br><br>ICD-10: I70, I71, I731, I738, I739, I771, I790, I792, K551, K558, K559, Z958, Z959 | Physician Claims<br>DAD<br>Emergency Department |
| Hypertension                    | ICD-9: 401, 402, 403, 404, 405<br><br>ICD-10: I10, I11, I12, I13, I15                                                                                                                                                                       | Physician Claims<br>DAD<br>Emergency Department |
| Paralysis                       | ICD-9: 334, 344, 342, 343, 334.1, 344.0, 344.1, 344.2, 344.3, 344.4, 344.5, 344.6, 344.9<br><br>ICD-10: G81, G82, G041, G114, G801, G802, G830, G831, G832, G833, G834, G839                                                                | Physician Claims<br>DAD<br>Emergency Department |

|                              |                                                                                                                                                                                                                                                                                           |                                                          |
|------------------------------|-------------------------------------------------------------------------------------------------------------------------------------------------------------------------------------------------------------------------------------------------------------------------------------------|----------------------------------------------------------|
| Other Neurological Disorders | <p>ICD-9: 331, 332, 333, 336, 348, 780, 784, 334, 335, 340, 341, 345, 331.9, 332.0, 332.1, 333.4, 333.5, 333.9, 336.2, 348.1, 348.3, 780.3, 784.3</p> <p>ICD-10: G10, G11, G12, G13, G20, G21, G22, G32, G35, G36, G37, G40, G41, R56, G254, G255, G312, G318, G319, G931, G934, R470</p> | <p>Physician Claims<br/>DAD<br/>Emergency Department</p> |
| Chronic Pulmonary Disease    | <p>ICD-9: 416, 506, 508, 490, 491, 492, 493, 494, 495, 496, 497, 498, 499, 500, 501, 502, 503, 504, 505, 416.8, 416.9, 506.4, 508.1, 508.8</p> <p>ICD-10: J40, J41, J42, J43, J44, J45, J46, J47, J60, J61, J62, J63, J64, J65, J66, J67, I278, I279, J684, J701, J703</p>                | <p>Physician Claims<br/>DAD<br/>Emergency Department</p> |
| Diabetes                     | <p>ICD-9: 250</p> <p>ICD-10: E10, E11, E12, E13, E14</p>                                                                                                                                                                                                                                  | <p>Physician Claims<br/>DAD<br/>Emergency Department</p> |
| Hypothyroidism               | <p>ICD-9: 240, 246, 243, 244, 240.9, 246.1, 246.8</p> <p>ICD-10: E00, E01, E02, E03, E890</p>                                                                                                                                                                                             | <p>Physician Claims<br/>DAD<br/>Emergency Department</p> |
| Renal Failure                | <p>ICD-9: 403, 404, 588, 585, 586, V56, 403.0, 403.1, 403.9, 404.0, 404.1, 404.9, 588.0, V42.0, V45.1</p> <p>ICD-10: N18, N19, I120, I131, N250, Z490, Z491, Z492, Z940, Z992</p>                                                                                                         | <p>Physician Claims<br/>DAD<br/>Emergency Department</p> |
| Liver Disease                | <p>ICD-9: 070, 456, 572, 573, 570, 571, 070.2, 070.3, 070.4, 070.5, 070.6, 070.9, 456.0, 456.1, 456.2, 572.2, 572.3, 572.4, 572.5, 572.6,</p>                                                                                                                                             | <p>Physician Claims<br/>DAD<br/>Emergency Department</p> |

|                                                  |                                                                                                                                                                                                                                                                                                                                                                                                                                                                                                                                                     |                                                 |
|--------------------------------------------------|-----------------------------------------------------------------------------------------------------------------------------------------------------------------------------------------------------------------------------------------------------------------------------------------------------------------------------------------------------------------------------------------------------------------------------------------------------------------------------------------------------------------------------------------------------|-------------------------------------------------|
|                                                  | 572.7, 572.8, 573.3, 573.4,<br>573.8, 573.9, V42.7<br><br>ICD-10: B18, I85, K70,<br>K72, K73, K74, I864, I982,<br>K711, K713, K714, K715,<br>K717, K760, K762, K763,<br>K764, K765, K766, K767,<br>K768, K769, Z944                                                                                                                                                                                                                                                                                                                                 |                                                 |
| Peptic Ulcer Disease Excluding<br>Bleeding       | ICD-9: 531, 532, 533, 534,<br>531.7, 531.9, 532.7, 532.9,<br>533.7, 533.9, 534.7, 534.9<br><br>ICD-10: K257, K259, K267,<br>K269, K277, K279, K287,<br>K289                                                                                                                                                                                                                                                                                                                                                                                         | Physician Claims<br>DAD<br>Emergency Department |
| HIV/AIDS                                         | ICD-9: 042, 043, 044<br><br>ICD-10: B20, B21, B22,<br>B24                                                                                                                                                                                                                                                                                                                                                                                                                                                                                           | Physician Claims<br>DAD<br>Emergency Department |
| Lymphoma                                         | ICD-9: 203, 238, 200, 201,<br>202, 203.0, 238.6<br><br>ICD-10: C81, C82, C83,<br>C84, C85, C88, C96, C900,<br>C902                                                                                                                                                                                                                                                                                                                                                                                                                                  | Physician Claims<br>DAD<br>Emergency Department |
| Solid Tumor Cancer with or<br>without metastasis | ICD-9: 140, 141, 142, 143,<br>144, 145, 146, 147, 148,<br>149, 150, 151, 152, 153,<br>154, 155, 156, 157, 158,<br>159, 160, 161, 162, 163,<br>164, 165, 166, 167, 168,<br>169, 170, 171, 172, 174,<br>175, 176, 177, 178, 179,<br>180, 181, 182, 183, 184,<br>185, 186, 187, 188, 189,<br>190, 191, 192, 193, 194,<br>195, 196, 197, 198, 199<br><br>ICD-10: C00, C01, C02,<br>C03, C04, C05, C06, C07,<br>C08, C09, C10, C11, C12,<br>C13, C14, C15, C16, C17,<br>C18, C19, C20, C21, C22,<br>C23, C24, C25, C26, C30,<br>C31, C32, C33, C34, C37, | Physician Claims<br>DAD<br>Emergency Department |

|                                 |                                                                                                                                                                                                                                                                                       |                                                 |
|---------------------------------|---------------------------------------------------------------------------------------------------------------------------------------------------------------------------------------------------------------------------------------------------------------------------------------|-------------------------------------------------|
|                                 | C38, C39, C40, C41, C43, C45, C46, C47, C48, C49, C50, C51, C52, C53, C54, C55, C56, C57, C58, C60, C61, C62, C63, C64, C65, C66, C67, C68, C69, C70, C71, C72, C73, C74, C75, C76, C77, C78, C79, C80, 97                                                                            |                                                 |
| Rheumatoid Arthritis            | ICD-9: 701, 710, 711, 719, 728, 729, 446, 714, 720, 725, 701.0, 710.0, 710.1, 710.2, 710.3, 710.4, 710.8, 710.9, 711.2, 719.3, 728.5, 728.8, 729.3<br><br>ICD-10: M05, M06, M08, M30, M32, M33, M34, M35, M45, L940, L941, L943, M120, M123, M310, M311, M312, M313, M461, M468, M469 | Physician Claims<br>DAD<br>Emergency Department |
| Coagulopathy                    | ICD-9: 287, 286, 287.1, 287.3, 287.4, 287.5<br><br>ICD-10: D65, D66, D67, D68, D691, D693, D694, D695, D696                                                                                                                                                                           | Physician Claims<br>DAD<br>Emergency Department |
| Obesity                         | ICD-9: 278, 278.0<br><br>ICD-10: E66                                                                                                                                                                                                                                                  | Physician Claims<br>DAD<br>Emergency Department |
| Weight loss                     | ICD-9: 783, 799, 260, 261, 262, 263, 783.2, 799.4<br><br>ICD-10: E40, E41, E42, E43, E44, E45, E46, R64, R634                                                                                                                                                                         | Physician Claims<br>DAD<br>Emergency Department |
| Fluid and Electrolyte Disorders | ICD-9: 253, 276, 253.6<br><br>ICD-10: E86, E87, E222                                                                                                                                                                                                                                  | Physician Claims<br>DAD<br>Emergency Department |
| Blood Loss Anemia               | ICD-9: 280.0<br><br>ICD-10: D500                                                                                                                                                                                                                                                      | Physician Claims<br>DAD<br>Emergency Department |
| Deficiency Anemia               | ICD-9: 280, 281, 280.1, 280.2, 280.3, 280.4, 280.5, 280.6, 280.7, 280.8, 280.9                                                                                                                                                                                                        | Physician Claims<br>DAD<br>Emergency Department |

|               |                                                                                                                                                                                                                                                                                   |                                                 |
|---------------|-----------------------------------------------------------------------------------------------------------------------------------------------------------------------------------------------------------------------------------------------------------------------------------|-------------------------------------------------|
|               | ICD-10: D51, D52, D53, D508, D509                                                                                                                                                                                                                                                 |                                                 |
| Alcohol Abuse | ICD-9: 265, 291, 303, 305, 357, 425, 535, 571, 980, 265.2, 291.1, 291.2, 291.3, 291.5, 291.6, 291.7, 291.8, 291.9, 303.0, 303.9, 305.0, 357.5, 425.5, 535.3, 571.0, 571.1, 571.2, 571.3, V11.3<br><br>ICD-10: F10, E52, T51, G621, I426, K292, K700, K703, K709, Z502, Z714, Z721 | Physician Claims<br>DAD<br>Emergency Department |
| Drug Abuse    | ICD-9: 305, 292, 304, 305.2, 305.3, 305.4, 305.5, 305.6, 305.7, 305.8, 305.9, V65.4<br><br>ICD-10: F11, F12, F13, F14, F15, F16, F18, F19, Z715, Z722                                                                                                                             | Physician Claims<br>DAD<br>Emergency Department |
| Psychoses     | ICD-9: 293, 296, 295, 297, 298, 293.8, 296.0, 296.1, 296.4, 296.5<br><br>ICD-10: F20, F22, F23, F24, F25, F28, F29, F302, F312, F315                                                                                                                                              | Physician Claims<br>DAD<br>Emergency Department |
| Depression    | ICD-9: 300, 309, 311, 296.2, 296.3, 296.5, 300.4<br><br>ICD-10: F32, F33, F204, F313, F314, F315, F341, F412, F432                                                                                                                                                                | Physician Claims<br>DAD<br>Emergency Department |

ABC, Alberta Blue Cross; ATC, Anatomical Therapeutic Chemical coding; CCP, Canadian Classification of Diagnostic, Therapeutic, and Surgical Procedures; DAD, discharge abstract database; ICD, International Statistical Classification of Diseases and Related Health Problems; PIN, Pharmaceutical Information Network.

#### References:

1. Graham MM, Majumdar SR, Norris CM, et al. Chapter 6: Diabetes and Cardiovascular Disease in Alberta. In: Johnson JA, ed. *Alberta Diabetes Atlas 2011*. Edmonton: Institute of Health Economics; 2011:75-114

2. Quan H, Sundararajan V, Halfon P, Fong A, Burnand B, Luthi JC, et al. Coding algorithms for defining comorbidities in ICD-9-CM and ICD-10 administrative data. *Med Care*. 2005;43(11):1130-9.
